# Supplementary material for: Green synthesis of gold nanoparticles and its application for the trace level determination of painter's colic
Source: Royal Society of Chemistry journal article supplement (doi:10.1039/c4ra14988b), 2015-01-01
Supplement: c4ra14988b1.pdf [file c4ra14988b1.pdf]

## Green synthesis of gold nanoparticles and its application for trace level determination of Painter's colic

K. Chelladurai,<sup>a</sup> P. Selvakumar,<sup>a</sup> S.M. Chen,<sup>a\*</sup> R. Emmanuel,<sup>b</sup> K. Muthupandi,<sup>b</sup> P. Prakash,<sup>b\*\*</sup>

<sup>a</sup>Department of Chemical Engineering and Biotechnology, National Taipei University of Technology, Taipei 106, Taiwan, ROC

<sup>b</sup>Post Graduate & Research Department of Chemistry, Thiagarajar College, Madurai-625009, Tamilnadu, India.

### Supporting information

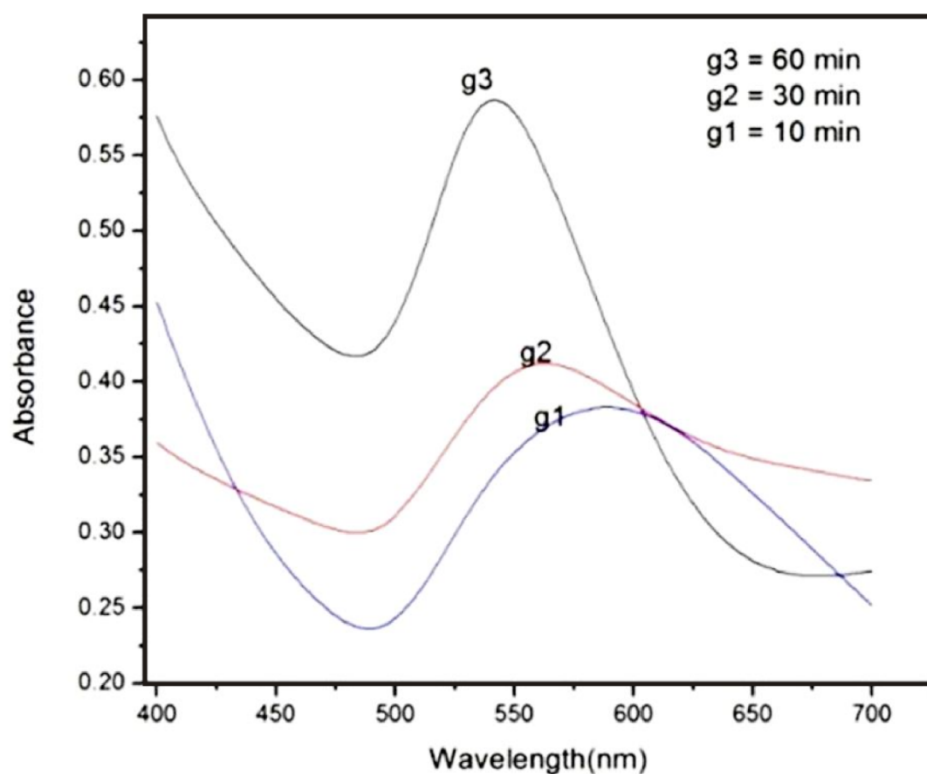

**Fig. S1** UV-Vis spectra of gold nanoparticles recorded at various time intervals. The SPR shows the increased absorbance in various time intervals ( $g_1=10$ ,  $g_2=30$  and  $g_3=60$  min) dependent

reaction of 100 mL of *Justicia glauca* leaf extract mixed with the 100 mL of aqueous solution of 1 mM chloroauric acid at room temperature.

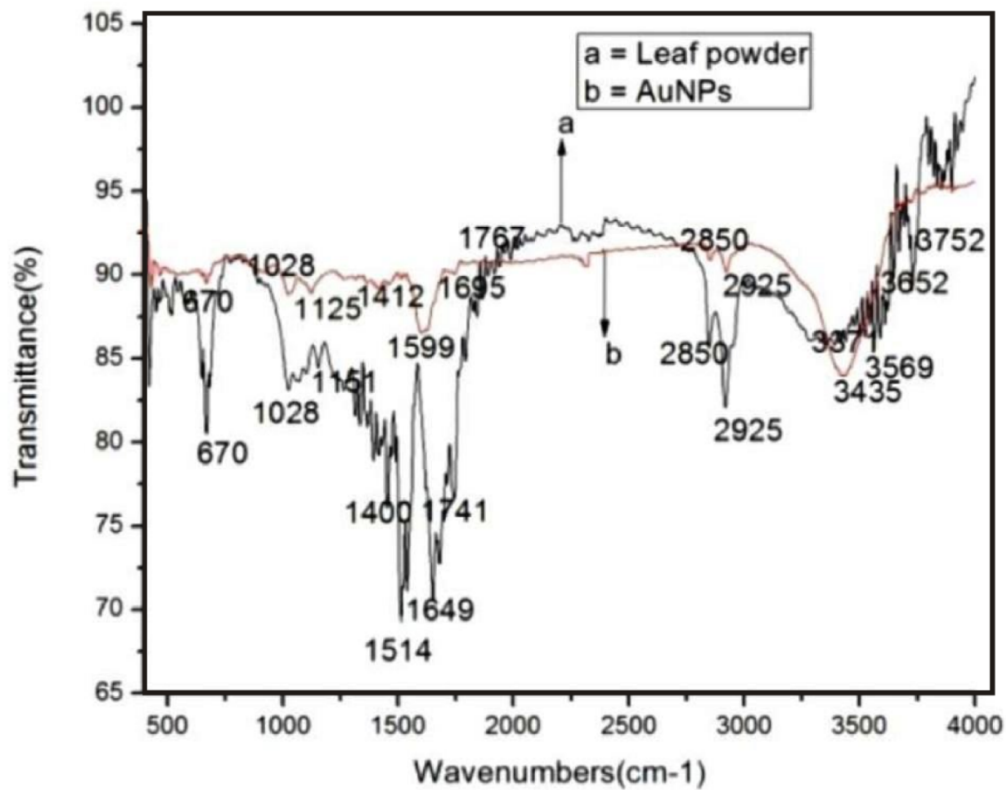

**Fig. S2** FTIR spectra of *Justicia glauca* leaf powder before (a) and after (b) encapsulation of Au-NPs.

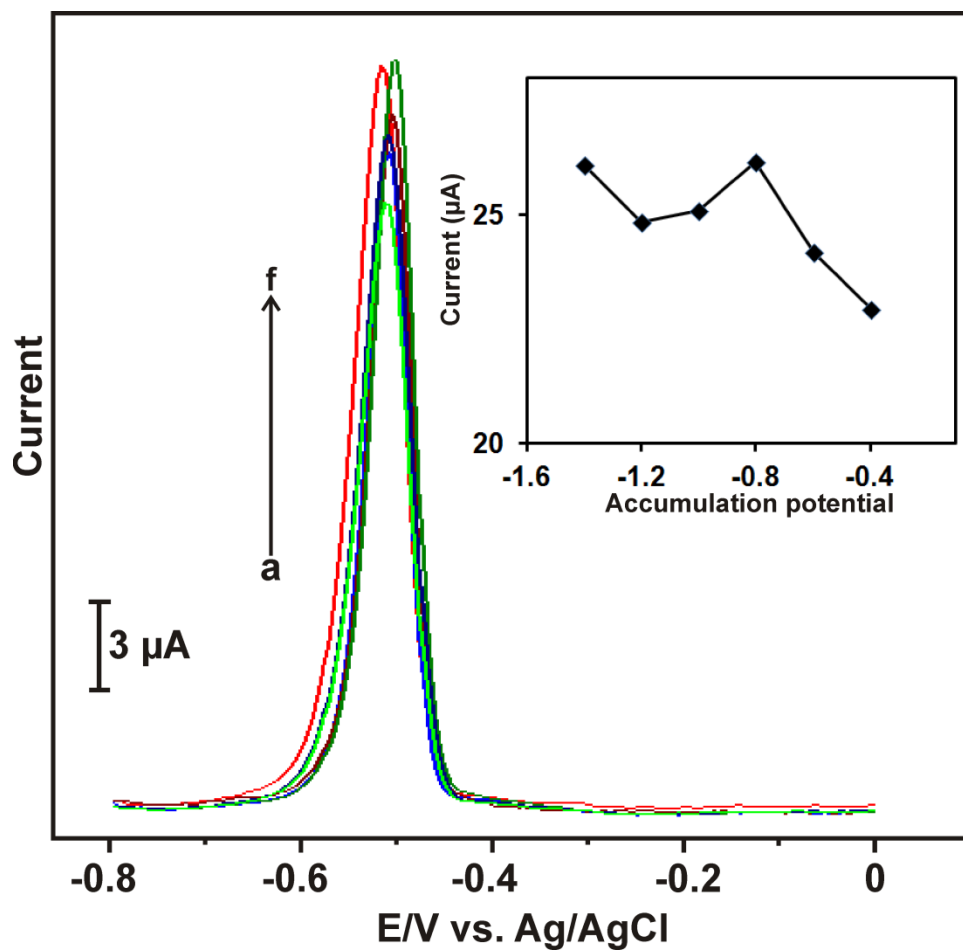

**Fig. S3** Differential pulse voltammetric response of the Au-NPs modified glassy carbon electrode to the response to 100  $\mu\text{M L}^{-1}$   $\text{Pb}^{2+}$  in pH 5 upon different accumulation potentials. Inset shows the corresponding plot for effect of accumulation potential vs. current response.

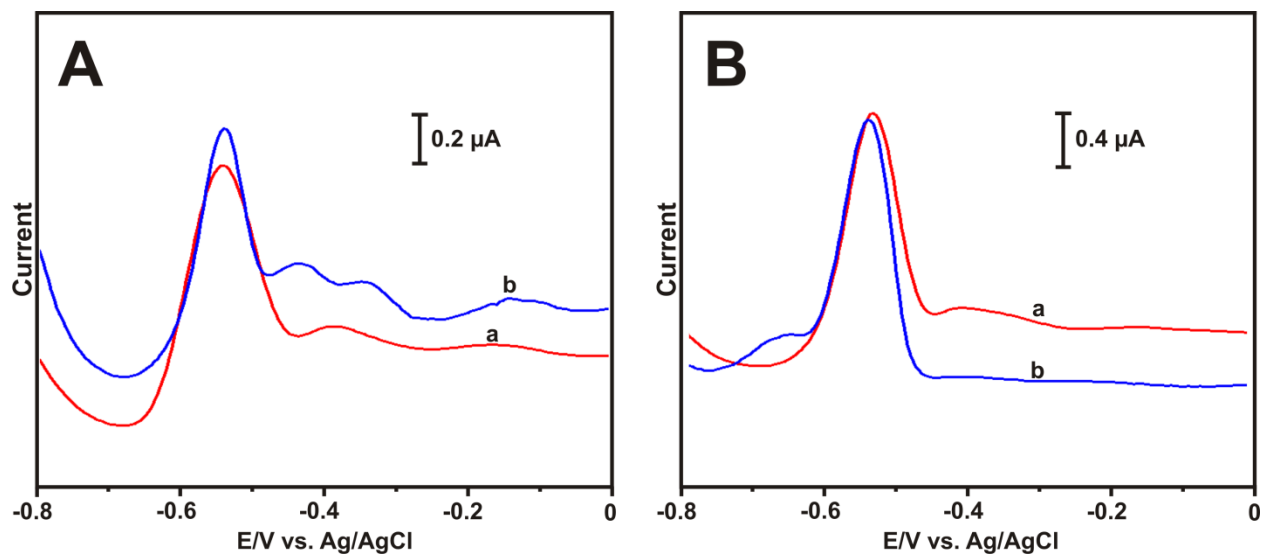

**Fig. S4** A) The DPV response of Au-NPs modified electrodes for the detection of  $0.5 \mu\text{M L}^{-1}$   $\text{Pb}^{2+}$  in river water solution. B) At same conditions, DPV response for the detection of  $1.2 \mu\text{M L}^{-1}$   $\text{Pb}^{2+}$ .

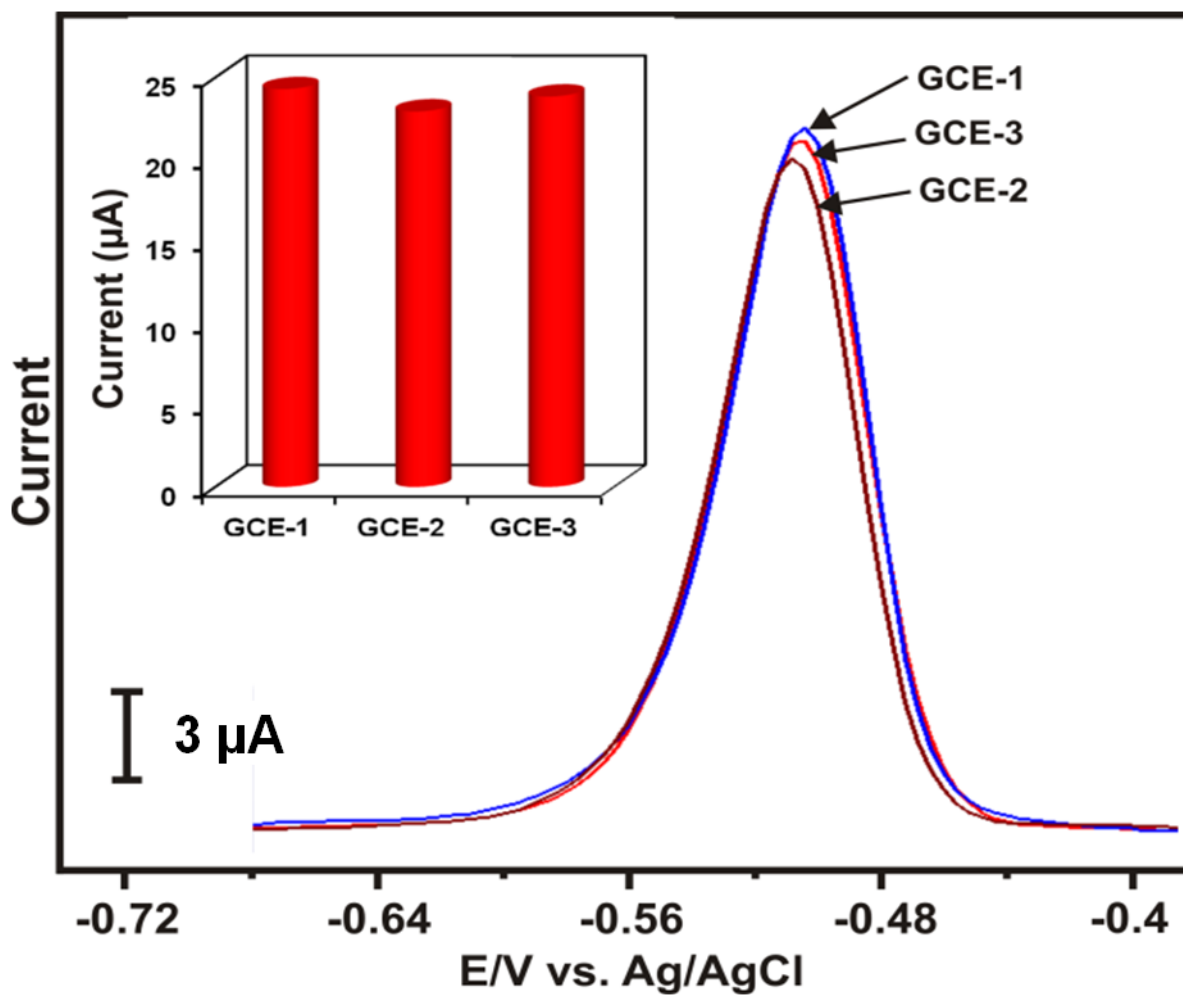

**Fig. S5** The DPV response of 3 sensor electrodes for the detection of  $50 \mu\text{M L}^{-1} \text{Pb}^{2+}$  in pH 5 solution.

**Table. ST1.** Comparison of the response time of the fabricated Pb<sup>2+</sup> sensor with previously reported different Pb<sup>2+</sup> sensors.

| Electrode                                          | Response time (sec) | Ref.         |
|----------------------------------------------------|---------------------|--------------|
| MWCNTs–nanosilica/CPE                              | 10                  | 1            |
| Phenyl hydrazone derivative carbon composite/PVCME | 6                   | 2            |
| Acrylamidezirconium (IV) arsenate /PVCME           | 20                  | 3            |
| Polyaminoanthraquinone/PVCME                       | 12                  | 4            |
| L-g-MWCNTS–CPE                                     | 25                  | 5            |
| Au-NPs–GCE                                         | 6                   | Present work |

**Abbreviations:**

MWCNTs – multiwalled carbon nanotubes; CPE – carbon paste electrode; PVCME – PVC membrane electrode; L-g-MWCNTS – L-grafted Multiwalled carbon nanotubes, GCE – glassy carbon electrode

**References**

1. M.R. Ganjali, N. Motakef-Kazami, F. Faridbod, S. Khoei and P. Norouzi, *J. Hazard. Mater.* 2010, **173**, 415.
2. A. Abbaspour, E. Mirahmadi, A. Khalafi-nejad and S. Babamohammadi, *J. Hazard. Mater.* 2010, **174**, 656.
3. S.A. Nabi, A.H. Shalla and S.A. Ganai, *Sep. Sci. Technol.* 2008, **43**, 164.
4. X.G. Li, X.L. Ma and M.R. Huang, *Talanta* 2009, **78**, 498.
5. J. Guo, Y. Chai, R. Yuan, Z. Song and Z. Zou, *Sens. Actuators, B* 2011, **155**, 639.
